# Supplementary material for: Transmission channels between financial development and CO2 emissions: A global perspective
Source: PubMed Central journal article supplement — Heliyon. 2020 Nov 18;6(11):e05509. doi: 10.1016/j.heliyon.2020.e05509 (PMC7683308; doi:10.1016/j.heliyon.2020.e05509), 2020-11-18
Supplement: mmc1.pdf [file mmc1.pdf]

# Appendix B

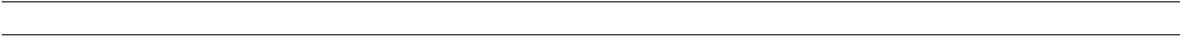

Table 1: 2SLS estimation results, Financial development: Domestic credit to private sector (% of GDP)

|                        | Energy<br>tion     | Consump- | CO2                  | GINI                | GDP per capita      |
|------------------------|--------------------|----------|----------------------|---------------------|---------------------|
| GDP per capita         | 0.008<br>(0.04)    |          | 0.048<br>(0.28)      | -0.085<br>(-0.87)   |                     |
| GDP per capita squared | -0.003<br>(-0.15)  |          | -0.002<br>(-0.10)    | 0.009<br>(0.72)     |                     |
| FD2                    | 0.326***<br>(3.98) |          | 0.231**<br>(2.31)    | -0.075**<br>(-2.15) | 1.869<br>(1.02)     |
| Industrialization      | 0.678***<br>(3.27) |          | 0.258<br>(1.21)      | 0.133*<br>(1.69)    | 1.769***<br>(2.81)  |
| Urbanisation           | 0.706***<br>(4.26) |          | 0.481**<br>(2.49)    | -0.094<br>(-1.55)   | -1.225**<br>(-2.44) |
| Renewable Energy       | -0.021<br>(-0.40)  |          | -0.211***<br>(-4.65) |                     | -0.115<br>(-0.68)   |
| GINI                   |                    |          | -1.570***<br>(-3.70) |                     |                     |
| Energy Consumption     |                    |          | 0.910***<br>(5.03)   |                     |                     |
| Trade                  |                    |          | -0.058<br>(-0.49)    |                     | 0.843**<br>(2.20)   |
| Inflation              |                    |          |                      | -0.205<br>(-0.87)   |                     |
| FD2 × FD2              |                    |          |                      |                     | -0.302<br>(-1.24)   |
| Observations           | 100                |          |                      |                     |                     |

\*, \*\*, \*\*\* indicates statistical significance at 10%, 5% and 1% level respectively

Table 2: 2SLS estimation results: interaction with income status; Financial development: Domestic credit to private sector (% of GDP)

|                        | Energy<br>tion     | Consump- | CO2                  | GINI                | GDP per capita     |
|------------------------|--------------------|----------|----------------------|---------------------|--------------------|
| GDP per capita         | 0.064<br>(0.35)    |          | 0.021<br>(0.12)      | -0.058<br>(-0.68)   |                    |
| GDP per capita squared | -0.010<br>(-0.44)  |          | 0.001<br>(0.05)      | 0.005<br>(0.48)     |                    |
| FD2                    | 0.328***<br>(4.01) |          | 0.221**<br>(2.11)    | -0.060**<br>(-2.02) | -0.168<br>(-0.48)  |
| FD2 × LMIC             |                    |          |                      | 0.077***<br>(5.76)  |                    |
| Industrialization      | 0.660***<br>(3.17) |          | 0.232<br>(1.05)      | 0.010<br>(0.14)     | 2.230***<br>(2.91) |
| Urbanisation           | 0.711***<br>(4.29) |          | 0.454**<br>(2.23)    | 0.013<br>(0.23)     | -0.795<br>(-1.10)  |
| Renewable Energy       | -0.019<br>(-0.36)  |          | -0.211***<br>(-4.51) |                     |                    |
| GINI                   |                    |          | -1.490***<br>(-3.42) |                     |                    |
| Energy Consumption     |                    |          | 0.954***<br>(4.90)   |                     | -0.449<br>(-0.63)  |
| Trade                  |                    |          | -0.045<br>(-0.37)    |                     | 0.945**<br>(2.56)  |
| Inflation              |                    |          |                      | 0.025<br>(0.12)     |                    |
| Observations           | 100                |          |                      |                     |                    |

\*, \*\*, \*\*\* indicates statistical significance at 10%, 5% and 1% level respectively

Table 3: 2SLS estimation results: Nonlinearity; Financial development: Domestic credit to private sector (% of GDP)

|                        | Energy Consumption | Consumption | CO2                  | GINI                | GDP per capita     |
|------------------------|--------------------|-------------|----------------------|---------------------|--------------------|
| GDP per capita         | 0.125<br>(0.58)    |             | 0.344<br>(0.75)      | -0.110<br>(-0.67)   |                    |
| GDP per capita squared | -0.017<br>(-0.66)  |             | -0.034<br>(-0.64)    | 0.011<br>(0.54)     |                    |
| FD2                    | 0.332**<br>(2.49)  |             | 0.673*<br>(1.71)     | 1.711**<br>(2.14)   | -0.643<br>(-1.45)  |
| FD2 Squared            |                    |             |                      | -0.271**<br>(-2.45) |                    |
| Industrialization      | 0.640***<br>(3.04) |             | 0.083<br>(0.25)      | -0.015<br>(-0.13)   | 2.063***<br>(2.63) |
| Urbanisation           | 0.716***<br>(4.02) |             | 0.397<br>(1.32)      | -0.011<br>(-0.11)   | -0.389<br>(-0.50)  |
| Renewable Energy       | -0.016<br>(-0.28)  |             | -0.186***<br>(-2.72) |                     |                    |
| GINI                   |                    |             | -0.390<br>(-0.37)    |                     |                    |
| Energy Consumption     |                    |             | 0.880***<br>(2.81)   |                     | -0.391<br>(-0.53)  |
| Trade                  |                    |             | -0.189<br>(-0.80)    |                     | 1.057***<br>(2.79) |
| Inflation              |                    |             |                      | 0.601<br>(1.40)     |                    |
| Observations           | 100                |             |                      |                     |                    |

\*, \*\*, \*\*\* indicates statistical significance at 10%, 5% and 1% level respectively

Table 4: 3SLS estimation results

|                               | Energy Consumption | Consumption | CO2                  | GINI                 | GDP per capita      |
|-------------------------------|--------------------|-------------|----------------------|----------------------|---------------------|
| GDP per capita                | -0.028<br>(-0.14)  |             | -0.061<br>(-0.32)    | -0.031<br>(-0.34)    |                     |
| GDP per capita squared        | -0.001<br>(-0.04)  |             | 0.013<br>(0.57)      | 0.001<br>(0.08)      |                     |
| Financial Development         | 0.171*<br>(1.95)   |             | 0.205**<br>(2.22)    | -0.116***<br>(-3.61) | 2.171<br>(1.37)     |
| Industrialization             | 0.734***<br>(3.31) |             | -0.086<br>(-0.37)    | 0.100<br>(1.29)      | 1.731***<br>(2.79)  |
| Urbanisation                  | 0.772***<br>(4.47) |             | 0.049<br>(0.25)      | -0.099*<br>(-1.68)   | -1.176**<br>(-2.37) |
| Renewable Energy              | -0.081<br>(-1.61)  |             | -0.175***<br>(-3.74) |                      | -0.139<br>(-0.84)   |
| GINI                          |                    |             | -0.875**<br>(-2.11)  |                      |                     |
| Energy Consumption            |                    |             | 1.504***<br>(9.23)   |                      |                     |
| Trade                         |                    |             | 0.024<br>(0.21)      |                      | 0.881**<br>(2.33)   |
| Inflation                     |                    |             |                      | -0.018<br>(-0.09)    |                     |
| Financial Development Squared |                    |             |                      |                      | -0.338<br>(-1.63)   |
| Observations                  | 100                |             |                      |                      |                     |

\*, \*\*, \*\*\* indicates statistical significance at 10%, 5% and 1% level respectively

Table 5: 3SLS estimation results: Interaction with income status

|                                     | Energy Consump-<br>tion | CO2                  | GINI                 | GDP per capita       |
|-------------------------------------|-------------------------|----------------------|----------------------|----------------------|
| GDP per capita                      | -0.038<br>(-0.19)       | -0.140<br>(-0.64)    | 0.019<br>(0.22)      |                      |
| GDP per capita squared              | -0.008<br>(-0.33)       | 0.025<br>(0.95)      | -0.007<br>(-0.63)    |                      |
| Financial Development               | 0.145*<br>(1.66)        | 0.150<br>(1.60)      | -0.113***<br>(-4.23) | -0.056<br>(-0.19)    |
| Financial development $\times$ LMIC |                         |                      | 0.077***<br>(7.42)   |                      |
| Industrialization                   | 0.838***<br>(3.77)      | -0.080<br>(-0.34)    | 0.002<br>(0.03)      | 2.720***<br>(3.54)   |
| Urbanisation                        | 0.676***<br>(3.96)      | 0.024<br>(0.12)      | 0.009<br>(0.17)      | 0.041<br>(0.05)      |
| Renewable Energy                    | -0.105**<br>(-2.27)     | -0.140***<br>(-3.00) |                      |                      |
| GINI                                |                         | -1.405***<br>(-3.34) |                      |                      |
| Energy Consumption                  |                         | 1.541***<br>(9.24)   |                      | -1.325***<br>(-2.05) |
| Trade                               |                         | 0.053<br>(0.45)      |                      | 0.955***<br>(2.65)   |
| Inflation                           |                         |                      | 0.313*<br>(1.77)     |                      |
| Observations                        | 100                     |                      |                      |                      |

\*, \*\*, \*\*\* indicates statistical significance at 10%, 5% and 1% level respectively

Table 6: 3SLS estimation results: Quadratic function

|                               | Energy Consump-<br>tion | CO2                  | GINI                | GDP per capita       |
|-------------------------------|-------------------------|----------------------|---------------------|----------------------|
| GDP per capita                | -0.050<br>(-0.26)       | -0.087<br>(-0.45)    | -0.145<br>(-1.28)   |                      |
| GDP per capita squared        | -0.007<br>(-0.31)       | 0.020<br>(0.85)      | 0.012<br>(0.88)     |                      |
| Financial Development         | 0.158*<br>(1.81)        | 0.180*<br>(1.95)     | 0.433*<br>(1.89)    | -0.065<br>(-0.23)    |
| Financial Development Squared |                         |                      | -0.074**<br>(-2.46) |                      |
| Industrialization             | 0.835***<br>(3.78)      | -0.100<br>(-0.43)    | 0.137<br>(1.57)     | 2.650***<br>(3.46)   |
| Urbanisation                  | 0.711***<br>(4.13)      | 0.047<br>(0.23)      | -0.106<br>(-1.61)   | -0.012<br>(-0.02)    |
| Renewable Energy              | -0.070<br>(-1.40)       | -0.174***<br>(-3.65) |                     |                      |
| GINI                          |                         | -1.108***<br>(-2.64) |                     |                      |
| Energy Consumption            |                         | 1.513***<br>(9.19)   |                     | -1.253***<br>(-1.97) |
| Trade                         |                         | 0.055<br>(0.49)      |                     | 0.864**<br>(2.40)    |
| Inflation                     |                         |                      | 0.008<br>(0.04)     |                      |
| Observations                  | 100                     |                      |                     |                      |

\*, \*\*, \*\*\* indicates statistical significance at 10%, 5% and 1% level respectively
